# Supplementary material
Source: PubMed Central journal article supplement (PMC6414364)

1            **Bacterial community assembly in a typical estuarine marsh with multiple**  
2                                            **environmental gradients**

3     Zhiyuan Yao<sup>1</sup>, Shicong Du<sup>1</sup>, Chunling Liang<sup>1</sup>, Yueji Zhao<sup>1</sup>, Francisco Dini-Andreote<sup>2</sup>,  
4     Kai Wang<sup>1,3</sup>, Demin Zhang<sup>1,3#</sup>

5

6     1. School of Marine Sciences, Ningbo University, Ningbo, 315211, China

7     2. Netherlands Institute of Ecology (NIOO-KNAW), Wageningen, The Netherlands

8     3. Collaborative Innovation Center for Zhejiang Marine High-efficiency and Healthy  
9     Aquaculture, Ningbo, 315211, China

10

11     **Running title:**

12     Bacterial community assembly in an estuarine marsh

13

14     **Corresponding author:**

15     Prof. Demin Zhang

16     Tel. 86-574-87600164    Fax 86-574-87608347    E-mail: zhangdemin@nbu.edu.cn

17

18 **Table S1** Comparison of relative abundances of dominant bacterial phyla (relative  
 19 abundance >3 % at least in one sample) among sediment transects.

| Taxonomy (%)               | Sediment     |              |              |
|----------------------------|--------------|--------------|--------------|
|                            | S-N          | S-M          | S-F          |
| <b>Gammaproteobacteria</b> | 17.10(1.64)a | 18.94(1.19)a | 13.33(2.44)b |
| <b>Deltaproteobacteria</b> | 16.34(0.95)a | 15.93(1.35)a | 14.22(4.11)b |
| <b>Chloroflexi</b>         | 14.68(1.54)b | 15.32(1.29)b | 18.90(2.39)a |
| <b>Bacteroidetes</b>       | 6.28(2.11)b  | 8.68(1.23)b  | 10.61(3.02)a |
| <b>Alphaproteobacteria</b> | 6.93(1.29)a  | 6.25(0.42)b  | 6.74(1.25)a  |
| <b>Planctomycetes</b>      | 4.97(1.32)b  | 7.43(1.59)a  | 4.79(1.53)b  |
| <b>Betaproteobacteria</b>  | 8.45(2.69)a  | 4.91(1.10)b  | 8.89(2.40)a  |
| <b>Actinobacteria</b>      | 3.25(0.54)a  | 1.81(0.37)b  | 2.47(1.33)a  |
| <b>Acidobacteria</b>       | 3.30(0.77)c  | 5.90(1.22)b  | 6.94(0.71)a  |
| <b>Verrucomicrobia</b>     | 1.83(0.84)b  | 2.66(0.85)a  | 2.91(0.56)a  |
| <b>Gemmatimonadetes</b>    | 1.58(0.66)b  | 2.60(0.21)b  | 4.05(2.29)a  |
| <b>Others</b>              | 15.29(5.61)a | 9.56(0.52)c  | 6.15(3.08)b  |

20 Values are means(SD). Values at the same columns followed by different letters differed  
 21 significantly at  $P < 0.05$ . See Table 1 for transect notation.

22

23 **Table S2** ADONIS test of the sediment transects based on the bacterial Bray-Curtis  
24 distance.

|            | 16S rRNA gene  |                 |
|------------|----------------|-----------------|
|            | R <sup>2</sup> | <i>P</i> -value |
| S-N vs S-M | 0.5794         | <b>0.010</b>    |
| S-N vs S-F | 0.3885         | <b>0.029</b>    |
| S-M vs S-F | 0.4493         | <b>0.004</b>    |

25 Data in bold are significantly correlated ( $P < 0.05$ ). For abbreviations, see Table 1.

**Table S3** Spearman's rank correlations between physico-chemical properties (Euclidean distance) and bacterial  $\beta$ -diversity (Bray-Curtis distance) for the sediment samples.

| Variables       | R <sup>2</sup> | $\rho$ |
|-----------------|----------------|--------|
| TN              | 0.3165         | 0.001  |
| AP              | 0.3158         | 0.001  |
| Silt            | 0.2942         | 0.003  |
| pH              | 0.2833         | 0.001  |
| Clay            | 0.2820         | 0.003  |
| Fe <sub>d</sub> | 0.2702         | 0.003  |
| Sand            | 0.2696         | 0.003  |
| Ammonia         | 0.2558         | 0.003  |
| OC              | 0.2258         | 0.004  |
| EC              | 0.2237         | 0.008  |
| AK              | 0.1759         | 0.023  |

$\rho$ : correlation coefficients between physico-chemical properties and bacterial community distance derived from Mantel test with 9999 permutations. The abbreviations of physico-chemical properties are the same as shown in Table 1

**Figure S1** Post-mean estimates and credible intervals (95%) of  $\alpha$ -diversity indexes of the sediment bacterial communities. (A) Shannon's diversity and evenness. (B) PD index and observed species. See Table 1 for transect notation.

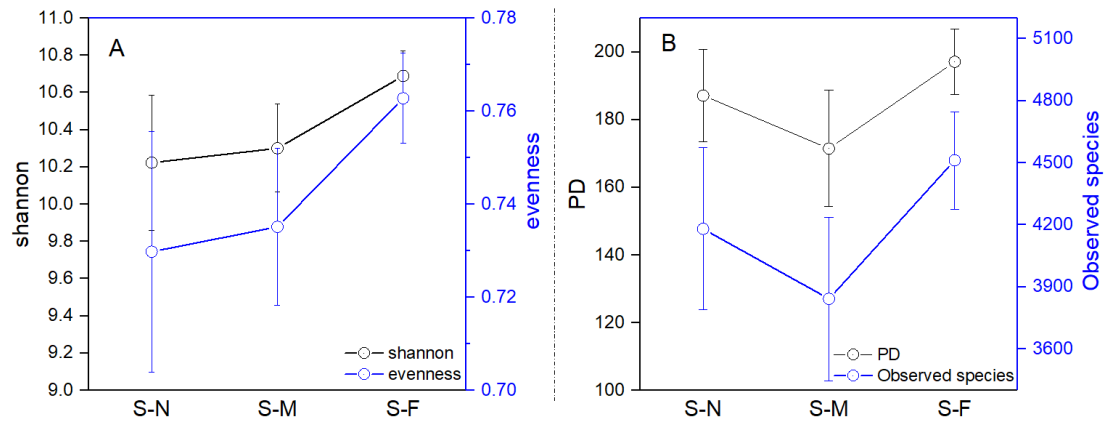

**Figure S2** Relative abundances of the dominant bacterial phyla (relative abundance >3 % at least in one sample) in the sediment samples. The predominant phyla of *Proteobacteria*, is grouped at the class level. Five biological replicates are displayed in separate stacked bars. See Table 1 for transect notation. Average relative abundances of all phyla and significant effects across sampling groups are listed in Supplementary materials Table 1.

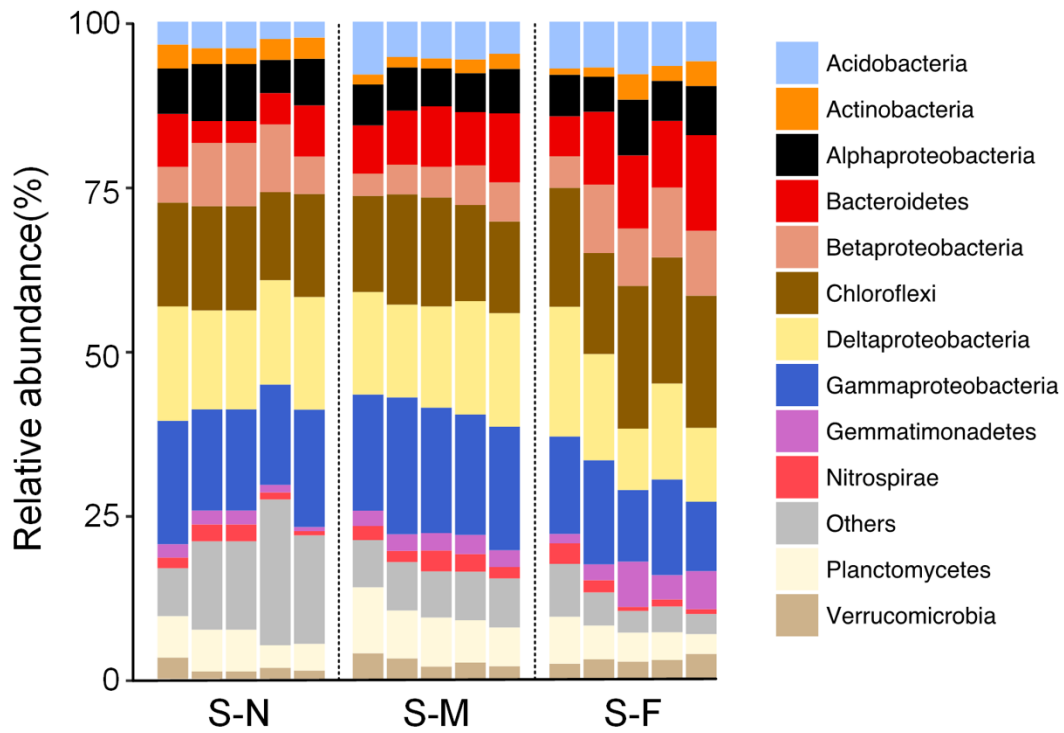



**Figure S4** Degree distribution for S-N, S-M and S-F networks.

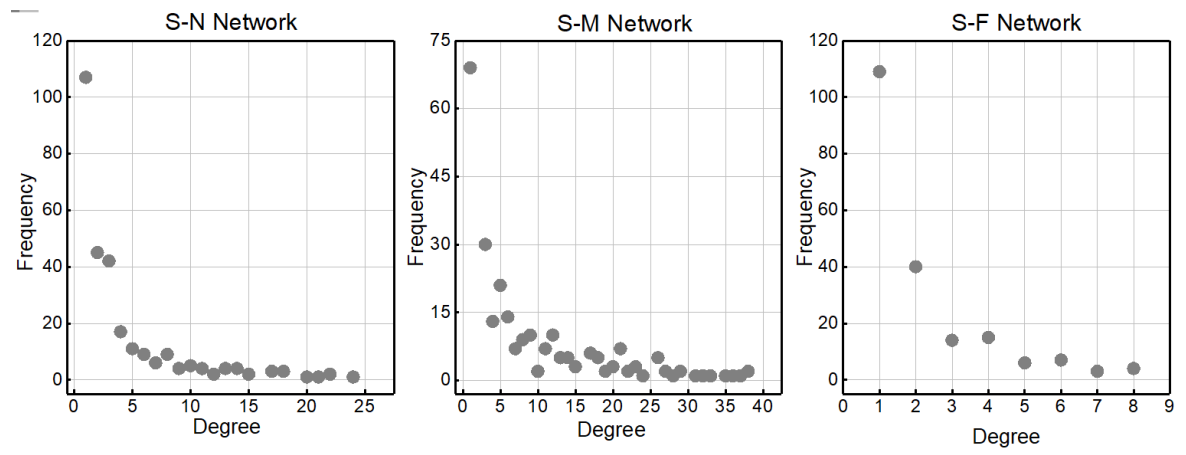



**Figure S5** Modularity of co-occurrence network in each sediment transect. Each dot represents a bacterial phylotype (an OTU clustered at 97%). Nodes are colored according to modularity class. The modules have different colors, and nodes in modules with less than 20 nodes are colored gray. Node size is proportional to the number of connections (that is, degree). Edges represent the correlation between two nodes. A connection represents a strong ( $r > 0.8$ ) and significant ( $P < 0.01$ ) correlation. See Table 1 for transect notation.

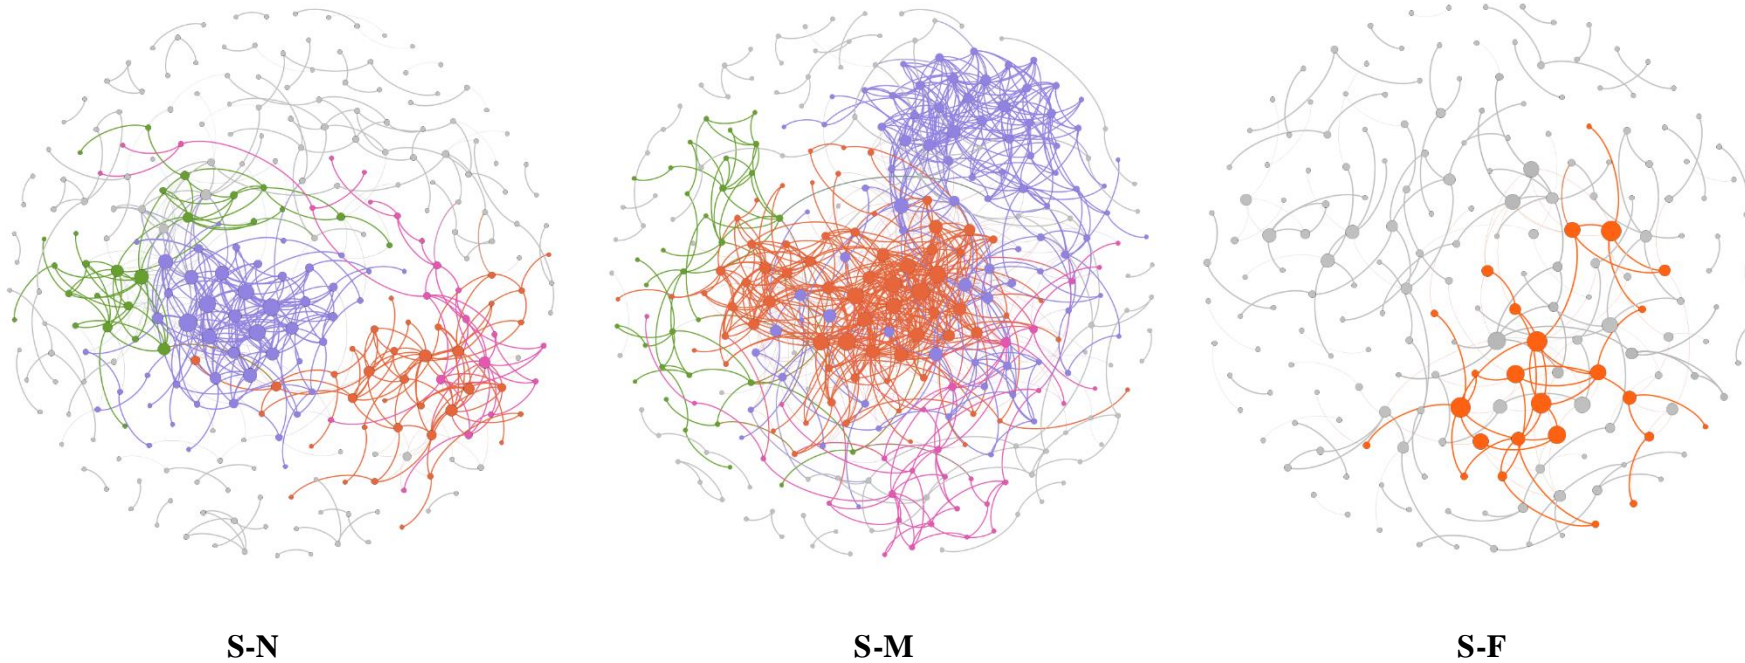

Supplement: AEM.02602-18-s0001.pdf [file AEM.02602-18-s0001.pdf]
